# Supplementary material for: How Cysteine Protease Gene PtCP5 Affects Seed Germination by Mobilizing Storage Proteins in Populus trichocarpa
Source: MDPI journal article supplement (doi:10.3390/ijms222312637), 2021-11-23
Supplement: s1 [file s1]

Table S1. Sequences and Accession Numbers of Representative Papain-like Cysteine Proteases (PLCPs).

| Name | Species                          | Sequence                                                                                                                                                                                                                                                                                                                                                                                                                       | Number             |
|------|----------------------------------|--------------------------------------------------------------------------------------------------------------------------------------------------------------------------------------------------------------------------------------------------------------------------------------------------------------------------------------------------------------------------------------------------------------------------------|--------------------|
| CTB1 | <i>Arabidops<br/>is thaliana</i> | MADSCCIRLHLLASVFLLLFSSFNLQGIAAENLSKQKLTSLILQNEIVKE<br>VNENPNAGWKAAFNDRFANATVAEFKRLLGVIQTPKTAYLGVPPIVRH<br>DLSLKLKPEFDARTAWSHCTSIRRILVG YILNNVLLWSTITLWFWLLG<br>HCGSCWAFGAVESLSDRFCIKYNLNVSLSANDVIACCGLLCGFGCN<br>GGFPMGAWLYFKYHGVVTQECDPYFDNTGCSHPGCEPTYPTPKCE<br>RKCVRNQLWGESKHYGVGAYRINPDPQDIMA EVYKNGPVEVAFTV<br>YEDFAHYKSGVYKYITGTKIGGHAVKLIGWGTSDDGEDYWLLANQW<br>NRSWGDDGYFKIRRG TNECGIEQSVVAGLPSEKNVFKGITTSDDLLV<br>SSV* | NP_563647          |
| CTB2 | <i>Arabidops<br/>is thaliana</i> | MADNCIRLLHSASVFFCLGLLISSFNLLQGIAAENLSKQKLT SWILQNE<br>IVKEVNENPNAGWKASFNDRFANATVAEFKRLLGVKPTPKTEFLGVPI<br>VSHDISLKLKPEFDARTAWSQCTSIGRILDQGHCGSCWAFGAVESLS<br>DRFCIKYNMNVSLSVNDLLACCGFLCGQGCNGGYPIAAWRYFKHHG<br>VVTEECDPYFDNTGCSHPGCEPAYPTPKCARKCVSGNQLWRESKH<br>YGV SAYKVRSH PDDIMA EVYKNGPVEVAFTVYEDFAHYKSGVYKHIT<br>GTNIGGHAVKLIGWGTSDDGEDYWLLANQWNRSWGDDGYFKIRRG<br>TNECGIEHGVVAGLP SDRNVVKGITTSDDLLVSSF*                   | XP_002889395       |
| CTB3 | <i>Arabidops<br/>is thaliana</i> | MAVYNTKLCLASVFLLLGLLLAFDLKGIEAESLTKQKLDSKILQDEIVKK<br>VNENPNAGWKAAINDRFSNATVAEFKRLLGVKPTPKKHFLGVPIVSH<br>DPSLKLKPAFDARTAWPQCTSIGNILDQGHCGSCWAFGAVESLSDR<br>FCIQFGMNISLSVNDLLACCGFRCDGCDGGYPIAAWQYFSYSGVV<br>TEECDPYFDNTGCSHPGCEPAYPTPKCSRKCVSDNKLWSESKHYSV<br>STYTVKSNPQDIMA EVYKNGPVEVSFTVYEDFAHYKSGVYKHITGSN<br>IGGHAVKLIGWGTSSSEGEDYWL MANQWNRGWGDDGYFMIRRGTN<br>ECGIEDEPVAGLPSSKNVFRVDTGSNDLPVASV*                         | XP_023637179<br>.1 |

|       |                                  |                                                                                                                                                                                                                                                                                                                                                                                                                                                                                                 |              |
|-------|----------------------------------|-------------------------------------------------------------------------------------------------------------------------------------------------------------------------------------------------------------------------------------------------------------------------------------------------------------------------------------------------------------------------------------------------------------------------------------------------------------------------------------------------|--------------|
| CEP1  | <i>Arabidops<br/>is thaliana</i> | MKRFIVLALCMLMVLETTKGLDFHNKDVESENSLWELYERWRSHHT<br>VARSLEEKAKRFNVFKHNVKHIHETNKKDKSYKLKLNKFGDMTSEEF<br>RRTYAGSNIKHHRMFQGEKKATKSFMYANVNTLPTSVDWRKNGAVT<br>PVKNQQQCGSCWAFSTVVAVEGINQIRTKKLTSLSEQELVDCDTNQN<br>QGCNGGLMDLAFEFIKEKGGLTSELVYPYKASDETCDTNKENAPVVS<br>IDGHEDVPKNSEDDLKAVANQPVSAIDAGGSDFQFYSEGVFTGR<br>CGTELNHGVAVVGYGTTIDGTKYWIVKNSWGEEWGEKGYIRMQRGI<br>RHKEGLCGIAMEASYPLKNSNTNPSRLSLDSLKDEL*                                                                                            | XP_002864049 |
| XCP2  | <i>Arabidops<br/>is thaliana</i> | MALSSPSRILCFALALSAASLSLSFASSHDYSIVGYSPEDLESHDKLIE<br>LFENWISNFEKAYETVEEKFLRFEVFKDNLKHIDETNKKGKSYWLGL<br>NEFADLSHEEFKKMYLGLKTDIVRRDEERSYAEFAYRDVEAVPKSVD<br>WRKKGAVAEVKNQGGSCGSCWAFSTVAAVEGINKIVTGNLTTLSEQEL<br>IDCDTTYNNGCNGGLMDYAFEYIVKNGGLRKEEDYPYSMEEGTCEM<br>QKDESETVTINGHQDVPTNDEKSLLKALAHQPLSVAIDASGREFQFY<br>SGGVFDGRCGVDLDHGVAAGVYGSSKGS DYIIVKNSWGPKWGEKG<br>YIRLKRNTGKPEGLCGINKMASFPTKTK*                                                                                             | NP_564126    |
| XBCP3 | <i>Arabidops<br/>is thaliana</i> | MSMSSSSFISLTFFFLLLVS SSSSSDDISELFDDWCQKHGKTYGSEE<br>ERQQRIQIFKDNHDFVTQHNLITNATYSLSLNAFADLTHHEFKASRLG<br>LSVSAPSVIMASKGQSLGGSVKVPDSVDWRKKGAVTNVKDQGSCG<br>ACWSFSATGAMEGINQIVTGD L ISLSEQELIDCDKSYNAGCNGGLMD<br>YAFEFVIKNHGIDTEKDYPYQERDGTCKKDKLKQKVVTIDSYAGVKS<br>NDEKALMEAVAAQPVSVGICGSERAFQLYSRGIFSGPCSTSLDHAVLI<br>VGYGSQNGVDYWIVKNSWGKSWGMDGFMHMQRNTENS DGVC GI<br>NMLASYPIKTHPNPPPPSPPGPTKCNLFTYCSSGETCCCARELFGLC<br>FSWKCCIEIASVCCCKDGRHCCPHDYPVCDTTRSLCLKKTGNFTAIP<br>FWKKNSSKQLGRFEEWVM* | AAK71314     |
| RD21A | <i>Arabidops<br/>is thaliana</i> | MGFLKPTMAILFLAMVAVSSAVDMSIISYDEKHGVSTTGGRSEAEVM<br>SIYEAWLVKHGKAQSQNSLVEKDRRFEIFKDNLRFVDEHNEKNLSYR<br>LGLTRFADLTNDEYRSKYLGA KMEKKGERRTSLRYEARVGDELPE SI<br>DWRKKGAVAEVKDQGGCGSCWAFSTIGAVEGINQIVTGD LITLSEQE<br>LVDCDTSYNEGCNGGLMDYAFEFIKNGGIDTDKDYPYKGV DGTCDQ<br>IRKNAKVVTIDS YEDVPTYSEESLKKAVAHQPISIAIEAGGRAFQLYDS<br>GIFDGSCGTQLDHGVVAVGYGTENGKDYWIVRNSWGKSWGESGYL<br>RMARNIASSSGKCGIAIEPSYPIKNGENPPNPGPSPSPPIKPPTQCDS<br>YYTCPESNTCCCLFEYGYKCYFAWGCCPLEAATCCDDNYSCCPHEY                     | XP_020866872 |

PVCDLDQGTCLLSKNSPFSVKALKRKRPATPFWSQGRKNIA\*

|       |                                  |                                                                                                                                                                                                                                                                                                                                                                                                            |           |
|-------|----------------------------------|------------------------------------------------------------------------------------------------------------------------------------------------------------------------------------------------------------------------------------------------------------------------------------------------------------------------------------------------------------------------------------------------------------|-----------|
| THI1  | <i>Arabidops<br/>is thaliana</i> | MLNVLRNSNLTAVLICFVLIASKLCSVDSSVYDPHKTLKQRFEKWLK<br>THSKLYGGRDEWMLRFGIYQSNVQLIDYINSLHLPFKLTDNRFADMT<br>NSEFKAHFLGLNTSSLRLHKKQRPVCDPAGNVPDAVDWRTQGAVTP<br>IRNQGKCGGCWAFSAVAAIEGINKIKTGNLVSLSEQQLIDCDVGTYNK<br>GCSGGLMETAFEFIKTNGGLATETDYPYTGIEGTCDQEKSKNKVVTI<br>QGYQKVAQNEASLQIAAAQPPVSVGIDAGGFIFQLYSSGVFTNYCGT<br>NLNHGVTVVGYGVEGDQKYWIVKNSWGTGWGEEGYIRMERGVSE<br>DTGKCGIAMMASYPLQ*                        | NP_563764 |
| SAG12 | <i>Arabidops<br/>is thaliana</i> | MALKHMQIFLFVAIFSSFCFSITLSRPLDNELIMQKRHIEWMTKHGRV<br>YADVKEENNRYVVFKNNVERIEHLNSIPAGRTFKLAVNQFADLTNDEF<br>CSMYTGFKGVSAISSQSQTMSPFYQNVSSGALPVSVDWRRKKGA<br>VTPIKNQGSCGCCWAFSAVAAIEGATQIKKGKLISSLSEQQLVDCDND<br>FGCEGGLMDTAFEHIKATGGLTTESDYPYKGEDATCNSKKTNPKATS<br>ITGYEDVPVNDEQALMKAVAHQPVSVGIEGGGDFDFQFYSSGVFTGE<br>CTTYLDHAVTAIGYGESTNGSKYWIKNNSWGTGWGESGYMRIQKDV<br>KDKQGLCGLAMKASYPTI*                    | AAC49135  |
| RD19A | <i>Arabidops<br/>is thaliana</i> | MDRLKLYFSVFVLSFFIVSVSSSDVNDGDDLVRQVVGGAEPQVLTSE<br>DHFSLFKRKFGKVYASNEEHDRFSVFKANLRRARRHQKLDPSATH<br>GVTQFSDLTRSEFRKKHLGVRSGFKLPKDANKAPILPTENLPEDFDW<br>RDHGAVTPVKNQGSCGSCWSFSATGALEGANFLATGKLVSLSEQQL<br>VDCDHECDPEEADSCDSGCNGGLMNSAFEYTLKTGGLMKEEDYPY<br>TGKDGKTCKLDKSKIVASVSNFSVISIDEEQIAANLVKNGPLAVAINAG<br>YMQTYIGGVSCPYICTRRLNHGVLLVGGAAGYAPARFKEKPYWIIK<br>NSWGETWGENGFYKICKGRNICGVDSMVSTVAATVSTTAH* | AAM65162  |

|       |                                     |                                                                                                                                                                                                                                                                                                                                                                                                                |              |
|-------|-------------------------------------|----------------------------------------------------------------------------------------------------------------------------------------------------------------------------------------------------------------------------------------------------------------------------------------------------------------------------------------------------------------------------------------------------------------|--------------|
| AALP  | <i>Arabidops<br/>is thaliana</i>    | MSAKTILSSVVLVVLVAASAAANIGFDESNPIRMVSDGLREVEESVSQI<br>LGQSRHVL SFARFTHRYGKKYQNV EEMKLRFSIFKENLDLIRSTNKK<br>GLSYKLG VNFADLTWQEFQRTKLGA AQNCSATLK GSHKVTEAALP<br>ETKDWREDGIVSPVKDQGGCGSCWTFSTTGALEAAYHQA FGGKISL<br>SEQQLVDCAGAFNNYGCNGGLPSQAF EYIKSNGGLDTEKAYPYTGK<br>DETCKFSAENVGVQVLNSVNITLGA EDELKHAVGLVRPVSI AFEVIHS<br>FRLYKSGVYTD SHCGSTPMDVNHAVLAVGYGVEDGV PYWLIKNSW<br>GADWGD KGYFKMEMGKNMCGIATCASYPVVA* | NP_568921    |
| 9.1   | <i>Populus<br/>trichocarp<br/>a</i> | MLCGQQATAEEPVSKLKLNSRILQDSIVQKVNENPKAGWEATMNPQ<br>FSNYSVGEFKYLLGVKQTPRKELRGVPLLRHPKSMKLP IEFDARTAW<br>PHCSTIGRILDQGHCGSCWAFGAVESLDRFCIHYGMNLSLSVNDLL<br>ACCGWMCGAGCDGGSPIDAWRYFVQSGVVTEECDPYFDDIGCSHP<br>GCEPGFPTPKCERKCADKNKLW AESKHFSVNAYRIDSDPHSMAEV<br>SSNGPV EVAFTVYEDFAHYKSGVYKHITGDAMGGH AVKLIGWGTSE<br>DGEDYWLLANQWNRGWGDDGYFKIKRGTNECGIEGAVVAGLPSTR<br>NLVREVAGIDGHEHATA*                             | XP_006375410 |
| 9.2   | <i>Populus<br/>trichocarp<br/>a</i> | METSLCFSTLLLLLIGAIFTFQSQVIAVEPVSDLKLNSRILQDSILKKVN<br>GNPKAGWKATMNHHSNYTVAQFKYLLGVKPTPK EELRGIPVISHPK<br>SLRLPEEFDARTAWPQCSTIGKILDQGHCGSCWAFGAVESLDRFCI<br>HYGMNISLSVNDLLACCGFLCGSGCNGGYPISAWRYFVHHGVVTEE<br>CDPYFDDIGCSHPGCEPGYPTPKCARKCVNKNQLW KSKHYGVKP<br>YRIDSDPESIMAEIYKNGPV EVAFTVYEDFAHYKSGVYKHITG GMMG<br>GHAVKLIGWGTSEDGEAYWLLANQWNRGWGDDGYFKIRRG TNEC<br>GIEGDVVAGLPSTRNLVREVVSDAREDASA*            | XP_002301457 |
| PtCP5 | <i>Populus<br/>trichocarp<br/>a</i> | MASPLYHGTLFLLVAALFTFHSQVIAVEPVSNLKLNSRILQDSIVQKVN<br>ENPNAGWEATMNPQFSNYSVGEFKYLLGVKPTPKELRGVPLVRHP<br>KSMKLPKEFDARTAWSHCSTIGRILDQGHCGSCWAFGAVESLDRF<br>CIHYGMNLSLSVNDLLACCGWMCGDGDGGYPIDAWRYFVQSGVV<br>TEECDPYFDDIGCSHPGCEPGFPTPKCERKCADKNKLW AESKHFSV<br>NAYRIDSDPHSMAEVSMNGPV EVAFTVYEDFAHYKSGVYKHITGDV<br>MGGHAVKLIGWGTSDDGEDYWLLANQWNRGWGDDGYFKIRRG TN<br>ECGIEEDVVAGLPSTRNLVREIAKIDAHEHASA*               |              |

---
